# Supplementary material for: VAV3 mediates resistance to breast cancer endocrine therapy
Source: PubMed Central journal article supplement (PMC4076632; doi:10.1186/bcr3664), 2014-05-28
Supplement: bcr3664-S12.pdf [file bcr3664-S12.pdf]

**Table S6** Results of the GWAS and replication study for SNPs in VAV3

|            |             | Allele<br>1/2 |   | Genotype count<br>(event) |    |    | Genotype count<br>(no event) |     |     | Minor allele<br>frequency<br>(event) | Minor allele<br>frequency<br>(no event) | Hardy-Weinberg<br>equilibrium <i>P</i> | Log-rank <i>P</i> |
|------------|-------------|---------------|---|---------------------------|----|----|------------------------------|-----|-----|--------------------------------------|-----------------------------------------|----------------------------------------|-------------------|
|            |             |               |   | 11                        | 12 | 22 | 11                           | 12  | 22  |                                      |                                         |                                        |                   |
| rs2504469  | GWAS        | T             | C | 10                        | 9  | 11 | 15                           | 91  | 104 | 0.48                                 | 0.29                                    | 0.64                                   | 1.1E-03           |
|            | Replication |               |   | 0                         | 10 | 6  | 6                            | 37  | 46  | 0.31                                 | 0.28                                    | 0.27                                   | 6.7E-01           |
|            | Combined    |               |   | 10                        | 19 | 17 | 21                           | 128 | 150 | 0.42                                 | 0.28                                    | 0.87                                   | 5.7E-03           |
| rs12142335 | GWAS        | A             | G | 0                         | 3  | 27 | 0                            | 6   | 204 | 0.05                                 | 0.01                                    | 0.77                                   | 3.5E-03           |
|            | Replication |               |   | 0                         | 1  | 15 | 0                            | 1   | 88  | 0.03                                 | 0.01                                    | 0.92                                   | 1.7E-01           |
|            | Combined    |               |   | 0                         | 4  | 42 | 0                            | 7   | 292 | 0.04                                 | 0.01                                    | 0.76                                   | 4.4E-03           |
| rs4462178  | GWAS        | T             | C | 0                         | 3  | 27 | 0                            | 6   | 204 | 0.05                                 | 0.01                                    | 0.77                                   | 3.5E-03           |
|            | Replication |               |   | 0                         | 1  | 15 | 0                            | 1   | 88  | 0.03                                 | 0.01                                    | 0.92                                   | 1.7E-01           |
|            | Combined    |               |   | 0                         | 4  | 42 | 0                            | 7   | 292 | 0.04                                 | 0.01                                    | 0.76                                   | 4.4E-03           |
| rs10494076 | GWAS        | A             | G | 27                        | 3  | 0  | 204                          | 6   | 0   | 0.05                                 | 0.01                                    | 0.77                                   | 3.5E-03           |
|            | Replication |               |   | 15                        | 1  | 0  | 88                           | 1   | 0   | 0.03                                 | 0.01                                    | 0.92                                   | 1.7E-01           |
|            | Combined    |               |   | 42                        | 4  | 0  | 292                          | 7   | 0   | 0.04                                 | 0.01                                    | 0.76                                   | 4.4E-03           |
| rs4466688  | GWAS        | T             | G | 10                        | 10 | 10 | 18                           | 102 | 90  | 0.50                                 | 0.33                                    | 0.69                                   | 4.3E-03           |
|            | Replication |               |   | 2                         | 9  | 5  | 6                            | 41  | 42  | 0.41                                 | 0.30                                    | 0.28                                   | 2.4E-01           |
|            | Combined    |               |   | 12                        | 19 | 15 | 24                           | 143 | 132 | 0.47                                 | 0.32                                    | 0.38                                   | 4.5E-03           |
| rs2494047  | GWAS        | T             | C | 11                        | 9  | 10 | 98                           | 93  | 19  | 0.48                                 | 0.31                                    | 0.50                                   | 4.4E-03           |
|            | Replication |               |   | 6                         | 7  | 3  | 44                           | 39  | 6   | 0.41                                 | 0.29                                    | 0.73                                   | 2.0E-01           |
|            | Combined    |               |   | 17                        | 16 | 13 | 142                          | 132 | 25  | 0.46                                 | 0.30                                    | 0.69                                   | 3.2E-03           |
| rs7543435  | GWAS        | A             | G | 10                        | 10 | 10 | 90                           | 100 | 20  | 0.50                                 | 0.33                                    | 0.98                                   | 6.0E-03           |
|            | Replication |               |   | 5                         | 8  | 3  | 41                           | 42  | 6   | 0.44                                 | 0.30                                    | 0.37                                   | 1.5E-01           |
|            | Combined    |               |   | 15                        | 18 | 13 | 131                          | 142 | 26  | 0.48                                 | 0.32                                    | 0.63                                   | 3.4E-03           |
| rs10494072 | GWAS        | T             | C | 17                        | 7  | 6  | 137                          | 69  | 4   | 0.32                                 | 0.18                                    | 0.87                                   | 7.3E-03           |
|            | Replication |               |   | 9                         | 7  | 0  | 63                           | 25  | 1   | 0.22                                 | 0.15                                    | 0.21                                   | 3.4E-01           |
|            | Combined    |               |   | 26                        | 14 | 6  | 200                          | 94  | 5   | 0.28                                 | 0.17                                    | 0.66                                   | 9.0E-03           |
| rs4915063  | GWAS        | A             | G | 9                         | 11 | 10 | 20                           | 97  | 93  | 0.48                                 | 0.33                                    | 0.93                                   | 8.2E-03           |
|            | Replication |               |   | 3                         | 8  | 5  | 6                            | 42  | 41  | 0.44                                 | 0.30                                    | 0.37                                   | 1.5E-01           |
|            | Combined    |               |   | 12                        | 19 | 15 | 26                           | 139 | 134 | 0.47                                 | 0.32                                    | 0.69                                   | 4.3E-03           |
| rs10494071 | GWAS        | T             | C | 3                         | 11 | 16 | 39                           | 110 | 61  | 0.28                                 | 0.45                                    | 0.64                                   | 8.7E-03           |
|            | Replication |               |   | 1                         | 5  | 10 | 17                           | 42  | 30  | 0.22                                 | 0.43                                    | 0.51                                   | 4.0E-02           |
|            | Combined    |               |   | 4                         | 16 | 26 | 56                           | 152 | 91  | 0.26                                 | 0.44                                    | 0.98                                   | 8.4E-04           |
| rs4914950  | GWAS        | T             | C | 3                         | 12 | 15 | 42                           | 108 | 60  | 0.30                                 | 0.46                                    | 0.81                                   | 1.2E-02           |
|            | Replication |               |   | 1                         | 6  | 9  | 18                           | 43  | 28  | 0.25                                 | 0.44                                    | 0.69                                   | 5.0E-02           |
|            | Combined    |               |   | 4                         | 18 | 24 | 60                           | 151 | 88  | 0.28                                 | 0.45                                    | 0.99                                   | 1.5E-03           |
| rs6693140  | GWAS        | T             | C | 15                        | 11 | 4  | 137                          | 66  | 7   | 0.32                                 | 0.19                                    | 0.76                                   | 2.5E-02           |
|            | Replication |               |   | 9                         | 7  | 0  | 55                           | 33  | 1   | 0.22                                 | 0.20                                    | 0.05                                   | 9.0E-01           |
|            | Combined    |               |   | 24                        | 18 | 4  | 192                          | 99  | 8   | 0.28                                 | 0.19                                    | 0.43                                   | 6.4E-02           |
| rs1410406  | GWAS        | A             | G | 3                         | 7  | 20 | 22                           | 102 | 86  | 0.22                                 | 0.35                                    | 0.70                                   | 3.0E-02           |
|            | Replication |               |   | 1                         | 5  | 10 | 11                           | 39  | 39  | 0.22                                 | 0.34                                    | 0.66                                   | 2.3E-01           |
|            | Combined    |               |   | 4                         | 12 | 30 | 33                           | 141 | 125 | 0.22                                 | 0.35                                    | 0.93                                   | 1.6E-02           |
| rs17019602 | GWAS        | A             | G | 16                        | 9  | 5  | 128                          | 76  | 6   | 0.32                                 | 0.21                                    | 0.73                                   | 3.4E-02           |
|            | Replication |               |   | 8                         | 8  | 0  | 60                           | 28  | 1   | 0.25                                 | 0.17                                    | 0.11                                   | 2.6E-01           |
|            | Combined    |               |   | 24                        | 17 | 5  | 188                          | 104 | 7   | 0.29                                 | 0.20                                    | 0.29                                   | 2.7E-02           |
| rs11185141 | GWAS        | T             | C | 17                        | 10 | 3  | 71                           | 110 | 29  | 0.27                                 | 0.40                                    | 0.37                                   | 3.6E-02           |
|            | Replication |               |   | 9                         | 6  | 1  | 37                           | 37  | 15  | 0.25                                 | 0.38                                    | 0.27                                   | 3.1E-01           |
|            | Combined    |               |   | 26                        | 16 | 4  | 108                          | 147 | 44  | 0.26                                 | 0.39                                    | 0.89                                   | 2.1E-02           |
| rs9804074  | GWAS        | A             | G | 1                         | 7  | 22 | 1                            | 35  | 174 | 0.15                                 | 0.09                                    | 0.88                                   | 3.9E-02           |
|            | Replication |               |   | 0                         | 4  | 12 | 2                            | 13  | 74  | 0.13                                 | 0.10                                    | 0.30                                   | 7.4E-01           |
|            | Combined    |               |   | 1                         | 11 | 34 | 3                            | 48  | 248 | 0.14                                 | 0.09                                    | 0.65                                   | 1.1E-01           |
| rs12746044 | GWAS        | A             | G | 4                         | 9  | 17 | 5                            | 64  | 141 | 0.28                                 | 0.18                                    | 0.88                                   | 4.3E-02           |
|            | Replication |               |   | 0                         | 6  | 10 | 1                            | 27  | 61  | 0.19                                 | 0.16                                    | 0.18                                   | 8.1E-01           |
|            | Combined    |               |   | 4                         | 15 | 27 | 6                            | 91  | 202 | 0.25                                 | 0.17                                    | 0.59                                   | 8.1E-02           |
| rs9803825  | GWAS        | A             | G | 5                         | 8  | 17 | 5                            | 74  | 131 | 0.30                                 | 0.20                                    | 0.75                                   | 4.4E-02           |
|            | Replication |               |   | 0                         | 8  | 8  | 1                            | 28  | 60  | 0.25                                 | 0.17                                    | 0.11                                   | 2.6E-01           |
|            | Combined    |               |   | 5                         | 16 | 25 | 6                            | 102 | 191 | 0.28                                 | 0.19                                    | 0.29                                   | 3.2E-02           |
| rs12039907 | GWAS        | A             | G | 16                        | 10 | 4  | 130                          | 76  | 4   | 0.30                                 | 0.20                                    | 0.27                                   | 4.5E-02           |
|            | Replication |               |   | 8                         | 8  | 0  | 51                           | 36  | 2   | 0.25                                 | 0.22                                    | 0.05                                   | 7.4E-01           |
|            | Combined    |               |   | 24                        | 18 | 4  | 181                          | 112 | 6   | 0.28                                 | 0.21                                    | 0.05                                   | 5.9E-02           |
| rs6583035  | GWAS        | T             | C | 20                        | 9  | 1  | 169                          | 39  | 2   | 0.18                                 | 0.10                                    | 0.98                                   | 4.6E-02           |
|            | Replication |               |   | 13                        | 3  | 0  | 68                           | 20  | 1   | 0.09                                 | 0.12                                    | 0.65                                   | 6.4E-01           |
|            | Combined    |               |   | 33                        | 12 | 1  | 237                          | 59  | 3   | 0.15                                 | 0.11                                    | 0.78                                   | 2.2E-01           |
